# Supplementary material for: Levels and Patterns of Nucleotide Variation in Domestication QTL Regions on Rice Chromosome 3 Suggest Lineage-Specific Selection
Source: PLoS One. 2011 Jun 6;6(6):e20670. doi: 10.1371/journal.pone.0020670 (PMC3108957; doi:10.1371/journal.pone.0020670)
Supplement: Table S2 — Genes associated with sequenced fragments at each QTL and their function. (XLS) [file pone.0020670.s002.xls]

## Sheet: Sheet1
QTL	Associated genes	Gene description
3A (sh3.1)	(-) LOC_Os03g01016	expressed protein
	(+) LOC_Os03g01110	RNA methyltransferase, TrmH family protein, expressed
	(+) LOC_Os03g01150	palmitoyl-protein thioesterase 1 precursor, putative, expressed
	(-) LOC_Os03g01190	quinone oxidoreductase, putative, expressed
	(+) LOC_Os03g01240	CCR4-Not complex component, Not1 family protein, expressed; transcription regulator
	(+) LOC_Os03g01320	NT16 polypeptide, putative, expressed
	(+) LOC_Os03g01360	expressed protein
	(+) LOC_Os03g01490	expressed protein
	(-) LOC_Os03g01590	protein PAIR1, putative, expressed
	(-) LOC_Os03g01750	protein tyrosine phosphatase, putative, expressed; 7 alternative splicing forms
	(+) LOC_Os03g01830	DEAD/DEAH box helicase, putative, expressed
	(-) LOC_Os03g01910	transcription factor BTF3, putative, expressed
	(+) LOC_Os03g01970	THO complex subunit 1, putative, expressed
	(+) LOC_Os03g02100	valyl-tRNA synthetase, putative, expressed
	(+) LOC_Os03g02160	zinc finger C-x8-C-x5-C-x3-H type family protein, expressed
	(+) LOC_Os03g02270	expressed protein
	(+) LOC_Os03g02320	ATP binding protein, putative, expressed
	(+) LOC_Os03g02450	expressed protein
	(+) LOC_Os03g02530	membrane protein, putative, expressed
	(+) LOC_Os03g02640	expressed protein
	(+) LOC_Os03g02710	hydroxymethylglutaryl-CoA synthase, putative, expressed
	(+) LOC_Os03g02756	1,3-beta-glucan synthase component bgs3, putative, expressed
3B (sh3.2)	(-) LOC_Os03g21090	axi 1 protein, putative, expressed
	(+) LOC_Os03g21240	PHR1, putative, expressed
	(-) LOC_Os03g21460	hydroxyacylglutathione hydrolase, putative, expressed
	(+) LOC_Os03g21530	ribosome biogenesis protein Bms1, putative, expressed
	(+) LOC_Os03g21630	PRC-barrel, putative, expressed
	(+) LOC_Os03g21720	vacuolar sorting receptor 1 precursor, putative, expressed
	(+) LOC_Os03g21800	transcription factor RF2b, putative, expressed
	(+) LOC_Os03g21850	expressed protein
	(-) LOC_Os03g21950	fumarate hydratase 1, mitochondrial precursor, putative, expressed
	(+) LOC_Os03g21990	PP1/PP2A phosphatases pleiotropic regulator PRL1, putative, expressed
	(-) LOC_Os03g22120	sucrose synthase 2, putative, expressed
	(-) LOC_Os03g22190	expressed protein
	(-) LOC_Os03g22270	auxin-repressed protein, putative, expressed
	(+) LOC_Os03g22380	pre-mRNA-splicing factor SF2, putative, expressed
	(-) LOC_Os03g22430	ATP-dependent Clp protease proteolytic subunit-like, putative, expressed
	(+) LOC_Os03g22540	jmjC domain containing protein, expressed
	(+) LOC_Os03g22570	ABH1, putative, expressed
	(-) LOC_Os03g22620	terpene synthase 7, putative, expressed
	(-) LOC_Os03g22690	nucleoporin interacting component, putative, expressed
	(-) LOC_Os03g22800	tubby protein, putative, expressed
	(+) LOC_Os03g22870	MCM3-associated protein, putative, expressed
	(+) LOC_Os03g23030	aberrant pollen transmission 1, putative, expressed
	(-) LOC_Os03G23950	AP-1 complex subunit beta-1, expressed
	(-) LOC_Os03g24060	mitochondria fission 1 protein, putative, expressed
	(-) LOC_Os03g24180	rho GTPase activator, putative, expressed
	(+) LOC_Os03g24220	villin-3, putative, expressed
	(+) LOC_Os03g24339	PWWP domain containing protein, expressed
	(-) LOC_Os03g24390	transmembrane protein 115, putative, expressed
3C (pss3.1 dth3.4 gw3.2, spp3.1 yld3.2 gpp3.1)	(+) LOC_Os03g57840	sterol-regulatory element binding protein site 2 protease containing protein, expressed
	(+) LOC_Os03g57940	ATP binding protein, putative, expressed
	(+) LOC_Os03g58060	XRN4, putative, expressed
	(+) LOC_Os03g58240	ATP binding protein, putative, expressed; Heterotrimeric G-protein GTPase
	(+) LOC_Os03g58340	expressed protein
	(+) LOC_Os03g58480	seed specific protein Bn15D14A, putative, expressed
	(+) LOC_Os03g58590	cactin, putative, expressed
	(+) LOC_Os03g58700	vacuolar protein sorting 35, putative, expressed
	(-) LOC_Os03g58810	ATP-dependent RNA helicase has1, putative, expressed
	(-) LOC_Os03g58910	expressed protein
	(+) LOC_Os03g58970	expressed protein
	(+) LOC_Os03g59060	OsPP2Ac-2 - Phosphatase 2A isoform 2 belonging to family 2, expressed; Serine/threonine specific protein phosphatase
	(-) LOC_Os03g59160	elongation factor P, putative, expressed
	(+) LOC_Os03g59240	carboxyl-terminal peptidase, putative, expressed
	(+) LOC_Os03g59330	polygalacturonase precursor, putative, expressed
	(+) LOC_Os03g59390	calcium-dependent protein kinase 2, putative, expressed
	(-) LOC_Os03g59480	expressed protein
	(+) LOC_Os03g59530	protein Kinase-associated protein phosphatase, putative, expressed
	(+) LOC_Os03g59640	magnesium-chelatase subunit chlD, chloroplast precursor, putative, expressed; Nucleoside-triphosphatase
	(-) LOC_Os03g59750	DNA gyrase subunit A, putative, expressed; DNA topoisomerase (ATP-hydrolysing)
	(+) LOC_Os03g60110	nucleic acid binding protein, putative, expressed
	(-) LOC_Os03g60180	GTP binding protein, putative, expressed
	(+) LOC_Os03g60370	acid phosphatase, putative, expressed
	(+) LOC_Os03g60550	NEDD8-activating enzyme E1 regulatory subunit, putative, expressed
	(+) LOC_Os03g60710	protein kinase APK1B, chloroplast precursor, putative, expressed; Protein-tyrosine kinase
	(-) LOC_Os03g60820	sugar transporter family protein, putative, expressed
	(+) LOC_Os03g60930	RNA-binding protein 28, putative
	(+) LOC_Os03g61010	TPR-containing protein kinase, putative, expressed; Protein-tyrosine kinase
	(-) LOC_Os03g61120	anthranilate synthase component I-1, chloroplast precursor, putative, expressed
	(+) LOC_Os03g61220	nucleolar RNA helicase 2, putative, expressed
	(-) LOC_Os03g61330	fumarylacetoacetate hydrolase domain-containing protein 1, putative, expressed
	(-) LOC_Os03g61540	triacylglycerol lipase, putative, expressed
	(+) LOC_Os03g61700	expressed protein
	(+) LOC_Os03g61820	flap endonuclease 1b, putative, expressed
	(-) LOC_Os03g61930	acyl-CoA binding protein, putative, expressed
	(+) LOC_Os03g62060	IAA-amino acid hydrolase ILR1 precursor, putative, expressed
	(+) LOC_Os03g62170	cyclase/dehydrase family protein, expressed
	(-) LOC_Os03g62260	monooxygenase/ oxidoreductase, putative, expressed
*(+) and (-) indicate the gene is on sense or antisense strand, respectively. The genes are listed in the order of their chromosomal positions on chromosome 3 from the short arm to the long arm.
